# Supplementary material
Source: Springer Nature journal article supplement (https://www.springermedizin.de/resource/supplementary/12982_2013_113_MOESM1_ESM.pdf/9604216)

A

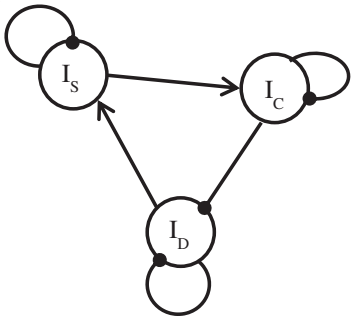

B

 $A_1 =$ 

|       | $I_S$ | $I_C$ | $I_D$ |
|-------|-------|-------|-------|
| $I_S$ | -1    | 0     | 1     |
| $I_C$ | 1     | -1    | 0     |
| $I_D$ | 0     | -1    | -1    |

Supplement: MOESM1 [file 9604216]
